# Supplementary material for: An NF-κB–driven lncRNA orchestrates colitis and circadian clock
Source: PubMed Central journal article supplement — Sci Adv. 2020 Oct 14;6(42):eabb5202. doi: 10.1126/sciadv.abb5202 (PMC7556837; doi:10.1126/sciadv.abb5202), 2020-10-14
Supplement: abb5202_SM.pdf [file abb5202_SM.pdf]

[advances.sciencemag.org/cgi/content/full/6/42/eabb5202/DC1](https://advances.sciencemag.org/cgi/content/full/6/42/eabb5202/DC1)

## Supplementary Materials for

### **An NF- $\kappa$ B–driven lncRNA orchestrates colitis and circadian clock**

Shuai Wang, Yanke Lin, Feng Li, Zifei Qin, Ziyue Zhou, Lu Gao, Zemin Yang, Zhigang Wang, Baojian Wu\*

\*Corresponding author. Email: [bj.wu@hotmail.com](mailto:bj.wu@hotmail.com)

Published 14 October 2020, *Sci. Adv.* **6**, eabb5202 (2020)  
DOI: [10.1126/sciadv.abb5202](https://doi.org/10.1126/sciadv.abb5202)

#### **This PDF file includes:**

Figs. S1 to S9  
Table S1

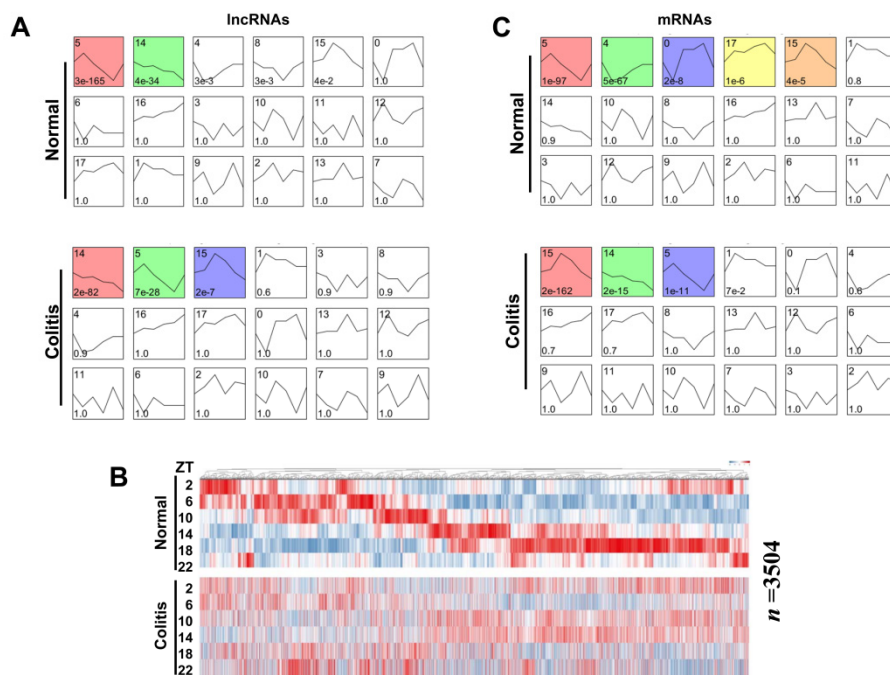

**Fig S1. Disrupted rhythmicity in cycling lncRNAs/mRNAs in colitis mice.** **(A)** Clustering analysis of cycling lncRNAs in colons of colitis and normal mice. **(B)** Heatmap for cycling mRNAs in colons of colitis and normal mice at 6 circadian time points. Red indicates high expression and blue indicates low expression of mRNAs as shown in the scale bar. **(C)** Clustering analysis of cycling mRNAs in colons of colitis and normal mice.

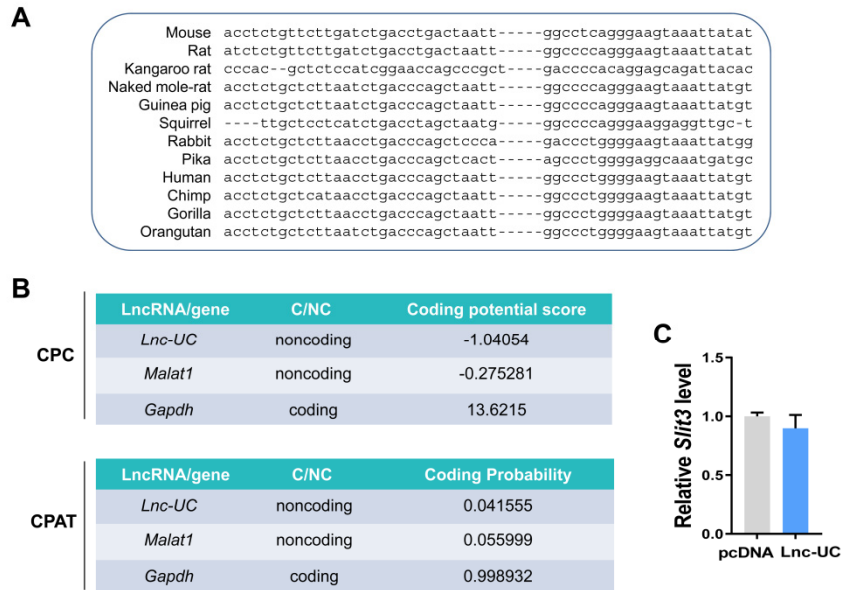

**Fig S2. *Lnc-UC* characterization. (A)** Sequence alignment of *Lnc-UC* in various species. **(B)** Predictions of protein-coding potential of RNAs based on coding potential calculator (CPC) and coding potential assessing tool (CPAT) software. **(C)** Effect of *Lnc-UC* overexpression on neighboring gene *Slit3* in BMDMs. Data are mean  $\pm$  SD (n = 5).

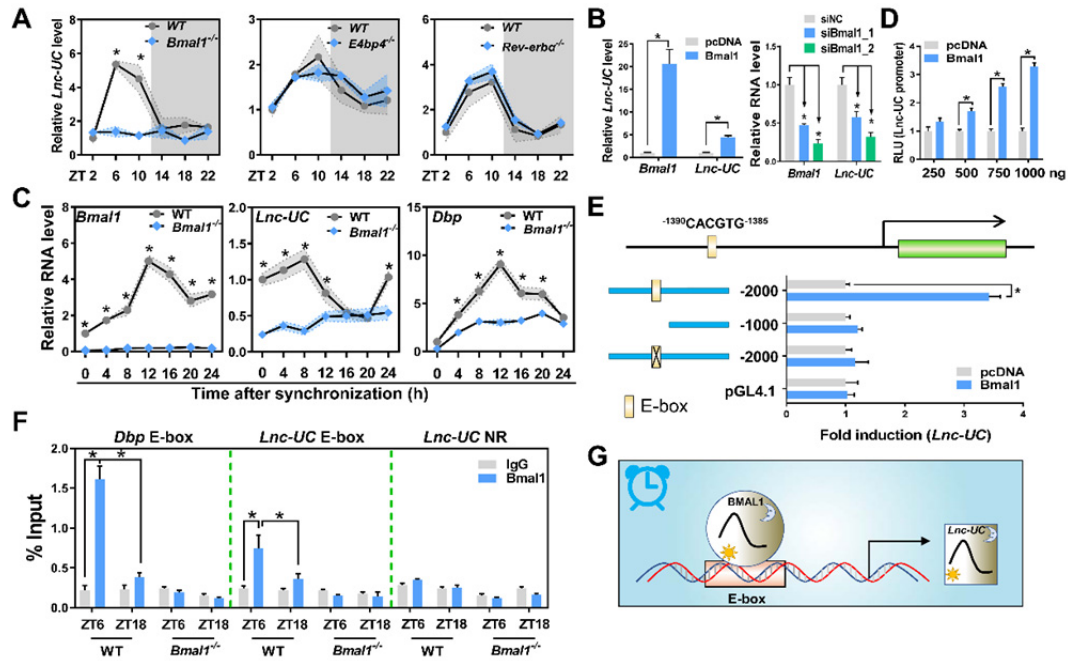

**Fig S3. Circadian clock gene *Bmal1* regulates rhythmic expression of *Lnc-UC*.** (A) Colonic *Lnc-UC* expression in *Bmal1*<sup>-/-</sup>, *E4bp4*<sup>-/-</sup>, *Rev-erba*<sup>-/-</sup> and wild-type mice at 6 circadian time points. Data are mean ± SD (n = 5). (B) Effects of *Bmal1* overexpression (left panel) and knockdown (right panel) on *Lnc-UC* in BMDMs. Data are mean ± SD (n = 5). (C) *Lnc-UC* levels in serum-shocked (synchronized) BMDMs derived from *Bmal1*<sup>-/-</sup> and wild-type mice. Data are mean ± SD (n = 5). (D) Effects of *Bmal1* on *Lnc-UC* promoter activity. Data are mean ± SD (n = 6). (E) Effects of *Bmal1* on different versions of *Lnc-UC* promoters. Data are mean ± SD (n = 6). (F) ChIP assays showing enrichment of *Bmal1* protein to the E-box sites in *Dbp* and *Lnc-UC* promoters. Data are mean ± SD (n = 5). NR, non-specific region. (G) Schematic diagram showing *Bmal1* regulation of *Lnc-UC* via the E-box element. In panels A and C, \*p < 0.05 at individual time points as determined by two-way ANOVA followed by Bonferroni post hoc test; in panels B (left), D and E, \*p < 0.05 as determined by Student's t test; in panel B (right), \*p < 0.05 as determined by one-way ANOVA followed by Bonferroni post hoc test; in panel F, \*p < 0.05 as determined by two-way ANOVA followed by Bonferroni post hoc test.

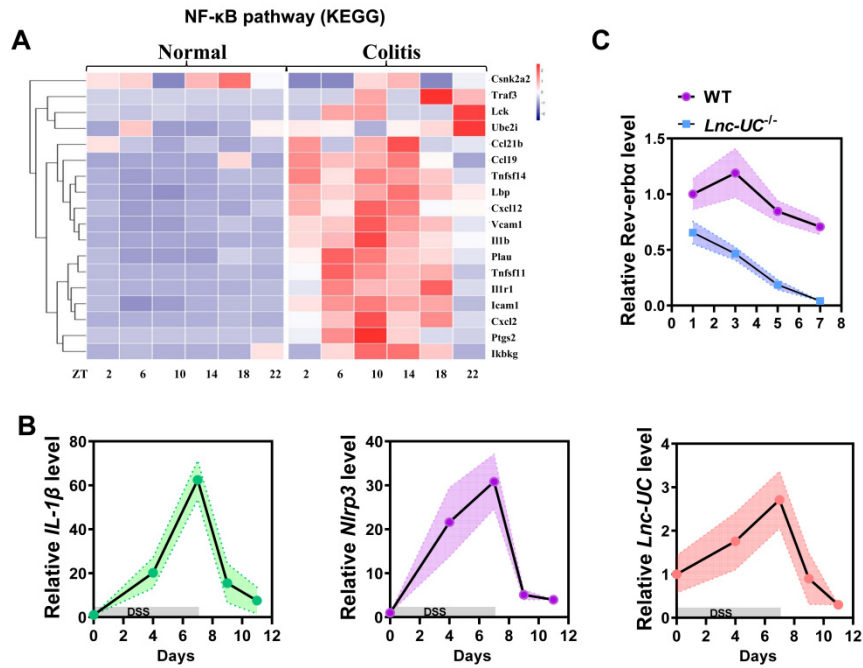

**Fig S4. Gene expression changes in colitis model.** (A) Heatmap for genes involved in NF- $\kappa$ B signaling pathway in colons of colitis and normal mice at 6 circadian time points. Red indicates high expression and blue indicates low expression as shown in the scale bar. (B) *Nlrp3*, *IL-1 $\beta$* , and *Lnc-UC* levels in colons of wild-type mice during and after DSS treatment. (C) *Rev-erba* levels in colons of *Lnc-UC*<sup>-/-</sup> mice and wild-type (WT) mice during DSS treatment. Data are mean  $\pm$  SD ( $n = 5$ ).

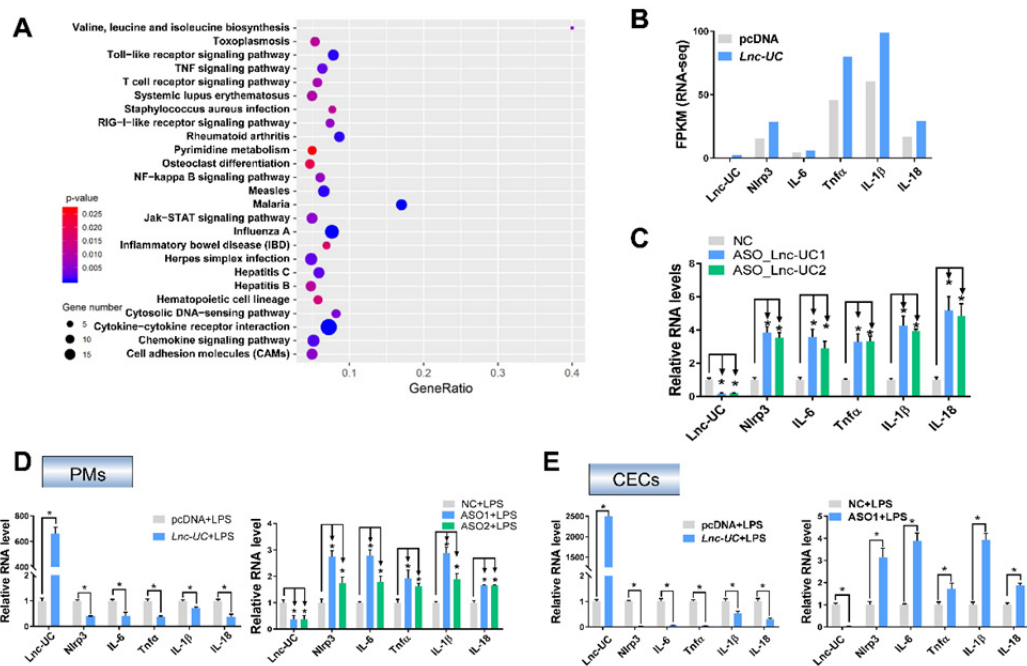

**Fig S5. *Lnc-UC* acts as an inflammatory regulator in BMDMs, PMs and CECs. (A)** KEGG analysis of *Lnc-UC*-induced differentially expressed genes ( $n = 582$ ) in BMDMs. **(B)** RNA-seq FPKM values of *Lnc-UC* and selected inflammatory factors. **(C)** *Lnc-UC* knockdown by ASO-Lnc-UC1 (ASO1) or ASO-Lnc-UC2 (ASO2) up-regulates NF- $\kappa$ B target genes in BMDMs. **(D)** *Lnc-UC* overexpression down-regulates (left panel), whereas *Lnc-UC* knockdown by ASO1 or ASO2 up-regulates (right panel), NF- $\kappa$ B target genes in LPS-treated PMs. **(E)** *Lnc-UC* overexpression down-regulates (left panel), whereas *Lnc-UC* knockdown by ASO1 or ASO2 up-regulates (right panel), NF- $\kappa$ B target genes in LPS-treated CECs. Data are mean  $\pm$  SD ( $n = 5$ ). In panels C and D (right),  $*p < 0.05$  as determined by one-way ANOVA followed by Bonferroni post hoc test; in panels D (left) and E,  $*p < 0.05$  as determined by Student's *t* test.

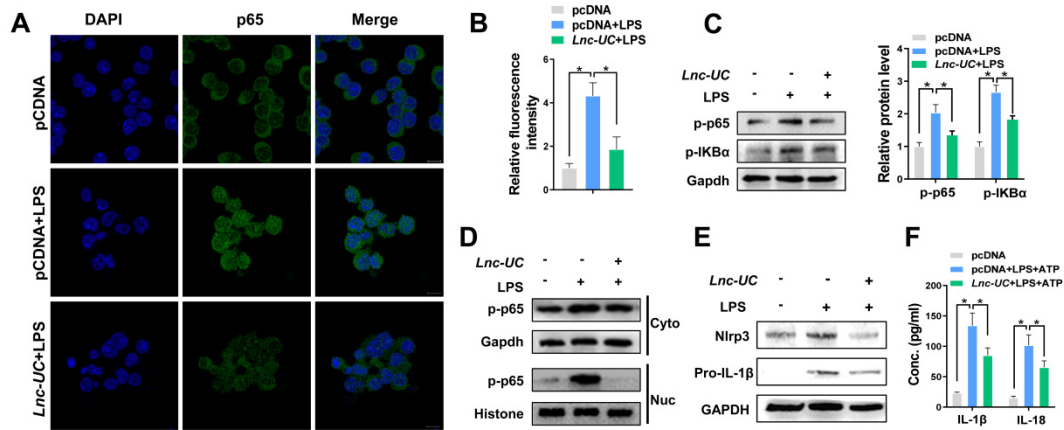

**Fig S6. Repressive role of *Lnc-UC* in regulation of NF- $\kappa$ B signaling and NLRP3 inflammasome.** (A) Immunofluorescence images showing *Lnc-UC* suppresses nuclear translocation of p65 in BMDMs. Scale bar = 10  $\mu$ m. (B) Quantification data on panel A. Data are mean  $\pm$  SD (n = 6). (C) *Lnc-UC* reduces protein levels of phosphorylated (p)-p65 and phosphorylated (p)-IKB $\alpha$  in BMDMs. (D) *Lnc-UC* reduces both cytoplasmic and nuclear p-p65 in BMDMs. (E) *Lnc-UC* reduces protein levels of Nlrp3 and pro-IL-1 $\beta$  in BMDMs. (F) *Lnc-UC* reduces IL-1 $\beta$  and IL-18 in BMDM incubation medium. Data are mean  $\pm$  SD (n = 5). NC, negative control. Cyto, cytoplasmic. Nuc, nuclear. In panels B, C and F, \*p < 0.05 as determined by one-way ANOVA followed by Bonferroni post hoc test.

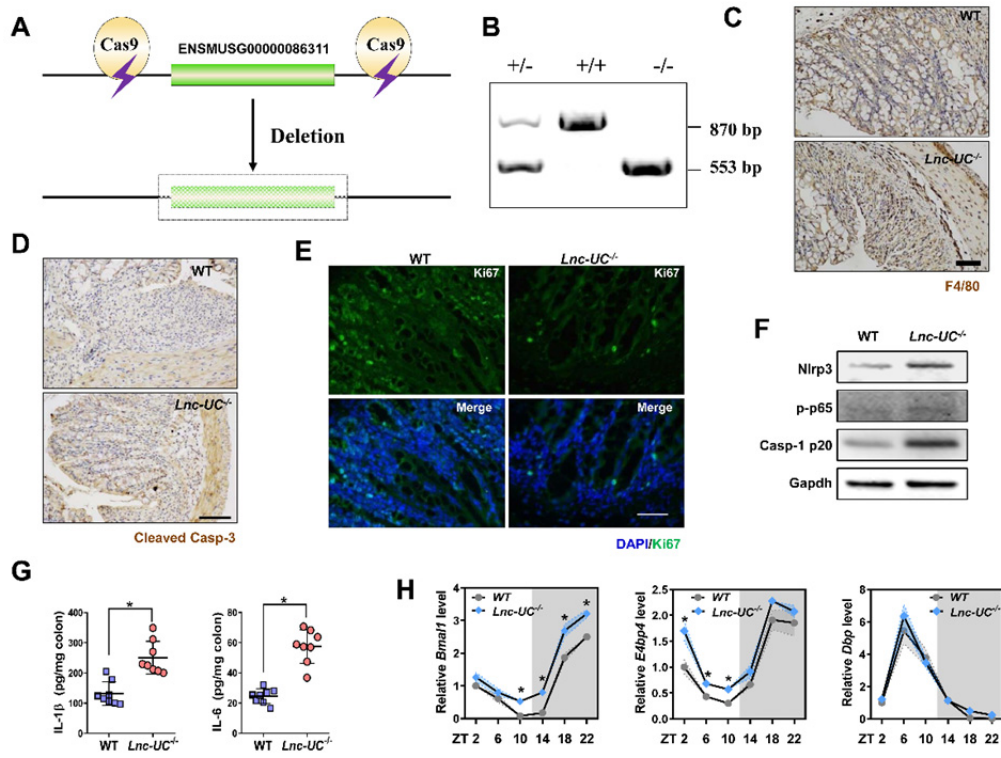

**Fig S7. *Lnc-UC* ablation sensitizes mice to experimental colitis and leads to disrupted expressions of circadian clock genes.** (A) Schematic of CRISPR/Cas9-mediated genome-editing procedure for *Lnc-UC* knockout mice. (B) Mouse genotyping image generated from agarose gel electrophoresis. (C) Immunohistochemistry for F4/80 in colons of *Lnc-UC*<sup>-/-</sup> and WT mice. (D) Immunohistochemistry for cleaved caspase-3 (casp-3) in colons of *Lnc-UC*<sup>-/-</sup> and WT mice. (E) Immunofluorescence for Ki67 in colons of *Lnc-UC*<sup>-/-</sup> and WT mice. (F) Protein expressions of Nlrp3, phosphorylated (p)-p65, and mature caspase-1 (caspase-1 p20) in colons of *Lnc-UC*<sup>-/-</sup> and WT mice. Caspase-1; Casp-1. (G) Expressions of inflammatory cytokines in colons of *Lnc-UC*<sup>-/-</sup> and WT mice. Data are mean ± SD (n = 8). (H) Expression of clock genes in the colons of *Lnc-UC*<sup>-/-</sup> and wild-type (WT) mice at 6 circadian time points. Data are mean ± SD (n = 5). In panel G, \*p < 0.05 as determined by Student's t test; in panel H, \*p < 0.05 at individual time points as determined by two-way ANOVA followed by Bonferroni post hoc test.



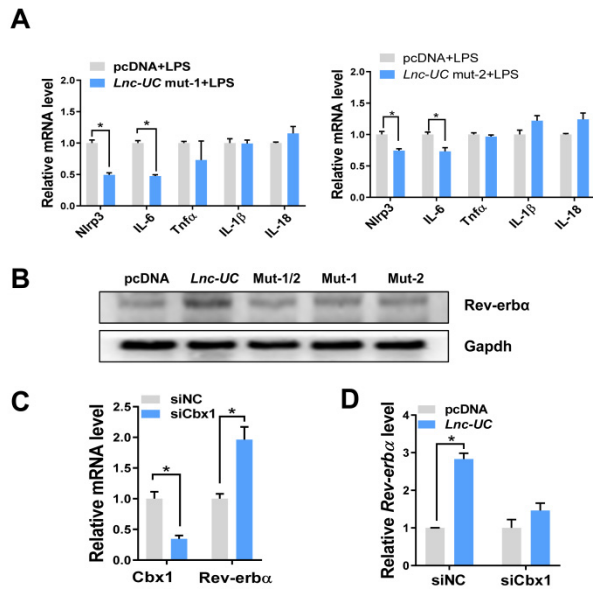

**Fig S8. *Lnc-UC* regulates *Rev-erba* transcription through attenuation of *Cbx1*-mediated tri-methylation of H3K9. (A)** Effects of single-site mutated *Lnc-UC* on NF- $\kappa$ B target genes in LPS-treated BMDMs. **(B)** Effects of mutated versions of *Lnc-UC* on *Rev-erba* protein in LPS-treated BMDMs. *Lnc-UC* mut-1 [*Lnc-UC* with mutated site (1-74 nt)], *Lnc-UC* mut-2 [*Lnc-UC* with mutated site (326-432 nt)], *Lnc-UC* mut-1/2 [*Lnc-UC* with mutated sites of (1-74 nt) and (326-432 nt)]. **(C)** *Cbx1* knockdown by siRNA up-regulates *Rev-erba* in BMDMs. **(D)** Effects of *Lnc-UC* on *Rev-erba* expression in BMDMs transfected with siCbx1 or siNC (siRNA for negative control). Data are mean  $\pm$  SD ( $n = 5$ ). In panels A, C and D, \* $p < 0.05$  as determined by Student's t test.

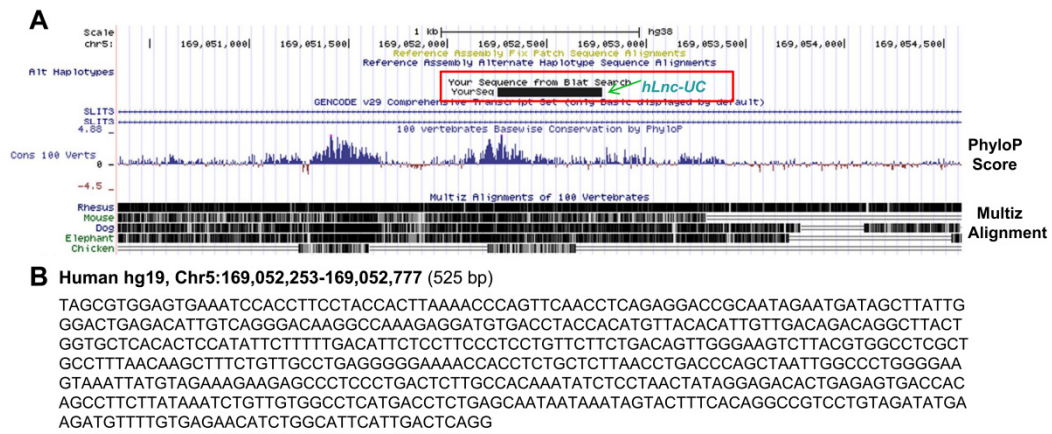

**Fig S9. *Lnc-UC* is conserved in humans. (A)** UCSC genome browser showing location of *hLnc-UC* in human genome. **(B)** Full-length cDNA sequence of human *Lnc-UC* (525 bp).

| <b>Name</b>                        | <b>Forward ( 5'-3' sequence)</b> | <b>Reverse ( 5'-3' sequence)</b> |
|------------------------------------|----------------------------------|----------------------------------|
| <i>mLnc-UC</i>                     | GAGGGGGTGTAAAGGGGGTAA            | ACTTAGGGATGAACGCAGCA             |
| <i>mNeat1</i>                      | TTGGGACAGTGGACGTGTGG             | TCAAGTGCCAGCAGACAGCA             |
| <i>mE4bp4</i>                      | CTTTCAGGACTACCAGACATCCAA         | GATGCAACTTCCGGCTACCA             |
| <i>mHmbs</i>                       | CCGAGCCAAGGACCAGGATA             | CTCCTTCCAGGTGCCTCAGA             |
| <i>mBmal1</i>                      | CTCCAGGAGGCAAGAAGATTC            | ATAGTCCAGTGGGAAGGAATG            |
| <i>mDbp</i>                        | ACATCTAGGGACACACCCAGTC           | AAGTCTCATGGCCTGGAATG             |
| <i>mRev-erba</i>                   | TTTTTCGCCGAGCATCCAA              | ATCTCGGCAAGCATCCGTTG             |
| <i>mIL-1<math>\beta</math></i>     | AATGCCACCTTTTGACAGTGATG          | AGCTTCTCCACAGCCACAAT             |
| <i>mNlrp3</i>                      | ATTACCCGCCGAGAAAGG               | TCGCAGCAAAGATCCACACAG            |
| <i>mIL-6</i>                       | ATCCAGTTGCCTTCTTGGGACTGA         | TAAGCCTCCGACTTGTGAAGTGGT         |
| <i>mTnfa</i>                       | AGGGTCTGGGCCATAGAACT             | CCACCACGCTCTTCTGTCTAC            |
| <i>mIL-18</i>                      | TCAAAGTGCCAGTGAACCCC             | GGTCACAGCCAGTCCTCTTAC            |
| <i>mSlit3</i>                      | CCACCAAGTGACCTGCTCC              | GCCAGCGAAGTCCATTTTGG             |
| <i>mCbx1</i>                       | TGATCGGCGAGTTGTCAAGG             | TCCAAGTGTTGTCTCATCTG             |
| <i>hLnc-UC</i>                     | CCTGAGTCAATGAATGCCAGATG          | TCTGTTGTGGCCTCATGACC             |
| <i>hREV-ERB<math>\alpha</math></i> | GACATGACGACCCTGGACTC             | GCTGCCATTGGAGTTGTCAC             |
| <i>hBMAL1</i>                      | ACTTCCCCTCTACCTGCTCA             | ATCCAGCCCCATCTTTGTGG             |
| <i>hNLRP3</i>                      | CCGCTATCTTTCTATTAAGTACCA         | TCAACCAGCTACAAAAGCATGG           |
| <i>hIL-1<math>\beta</math></i>     | GCTCGCCAGTGAAATGATGG             | GGTGGTCGGAGATTCGTAGC             |
| <i>hIL-6</i>                       | ACCCCAGGAGAAGATTCCA              | GATGCCGTCGAGGATGTACC             |
| <i>hTNF<math>\alpha</math></i>     | TGGGATCATTGCCCTGTGAG             | GGTGTCTGAAGGAGGGGGTA             |
| <i>hIL-18</i>                      | GCTGAAGATGATGAAAACCTGGA          | GAGGCCGATTTCTTGGTCA              |
| <i>hGAPDH</i>                      | CATGAGAAGTATGACAACAGCCT          | AGTCCTTCCACGATACCAAAGT           |

m: mouse h:human

**Table S1.** Sequences of primers for qPCR analysis
